# Supplementary material for: Postharvest Quality Improvement of Bell Pepper (Capsicum annuum L. cv Nagano) with Forced-Air Precooling and Modified Atmosphere Packaging
Source: MDPI journal article supplement (doi:10.3390/foods12213961), 2023-10-30
Supplement: s1 [file s1]

Supporting Information

Table S1. Soluble sugars (sucrose, glucose, and fructose) of bell pepper cv. Nagano

| Parameter          | Treatment | 90% coloring |              |               |              |              | 50% coloring  |              |               |               |
|--------------------|-----------|--------------|--------------|---------------|--------------|--------------|---------------|--------------|---------------|---------------|
|                    |           | 3days        | 6days        | 9days         | 12days       | 15days       | 4days         | 8days        | 12days        | 16days        |
| Sucrose (mg/g DW)  | FOLO      | 37.14±35.1a  | 23.36±4.6a   | 48.67±69.2a   | 17.12±4.4ab  | 18.73±5.6a   | 100.04±71.1a  | 40.52±25.4a  | 22.23±6.7a    | 24.85±5.5a    |
|                    | FOLX      | 17.25±7.7a   | 15.34±4.2b   | 21.01±8.3a    | 13.80±4.7b   | 22.23±14.8a  | 47.90±30.4a   | 39.46±29.2a  | 20.60±10.7a   | 18.01±4.9b    |
|                    | FXLO      | 19.22±4.3a   | 20.73±3.5ab  | 17.45±7.4a    | 20.92±6.2a   | 17.17±1.6a   | 43.17±23.0a   | 19.92±10.4a  | 18.28±7.2a    | 15.49±5.5b    |
|                    | FXLX      | 14.92±8.5a   | 19.98±7.6ab  | 34.11±21.3a   | 12.95±6.4b   | 15.48±5.6a   | 73.50±119.1a  | 19.87±3.3a   | 14.71±3.7a    | 14.36±4.1b    |
|                    |           | ns           | ns           | ns            | ns           | ns           | ns            | ns           | ns            | **            |
| Glucose (mg/g DW)  | FOLO      | 277.20±44.5a | 240.77±42.4a | 268.20±59.5a  | 211.21±64.8a | 257.13±48.1a | 221.14±53.6a  | 278.91±44.9a | 298.74±69.3a  | 257.28±25.5a  |
|                    | FOLX      | 290.11±88.1a | 273.70±80.9a | 306.72±130.2a | 255.93±53.7a | 254.44±95.7a | 283.92±89.6a  | 298.81±68.7a | 274.82±100.1a | 286.39±91.9a  |
|                    | FXLO      | 239.32±39.3a | 238.23±85.8a | 252.46±53.1a  | 262.17±47.6a | 270.79±47.8a | 284.67±17.5a  | 241.84±41.4a | 251.59±72.1a  | 300.97±60.9a  |
|                    | FXLX      | 251.65±60.3a | 297.77±77.0a | 231.21±37.3a  | 278.73±64.4a | 221.77±63.8a | 215.89±65.6a  | 306.06±61.6a | 294.63±73.5a  | 317.13±87.3a  |
|                    |           | ns           | ns           | ns            | ns           | ns           | ns            | ns           | ns            | ns            |
| Fructose (mg/g DW) | FOLO      | 268.05±50.5a | 235.47±40.0a | 253.66±67.9a  | 201.63±64.7a | 259.25±37.0a | 195.00±46.2b  | 263.92±31.5a | 270.24±32.0a  | 255.84 ±12.9a |
|                    | FOLX      | 265.86±84.4a | 233.74±54.7a | 278.93±108.2a | 240.71±49.2a | 228.91±77.6a | 213.98±70.3ab | 254.23±48.9a | 237.84±94.2a  | 252.83±64.8a  |
|                    | FXLO      | 219.74±33.2a | 212.69±52.1a | 234.46±52.1a  | 255.52±41.5a | 258.16±35.0a | 267.30±14.0a  | 205.53±56.3a | 238.89±72.5a  | 251.16±33.3a  |
|                    | FXLX      | 226.30±47.0a | 284.19±79.0a | 215.01±41.6a  | 238.67±75.9a | 203.61±63.5a | 187.09±62.8b  | 258.41±48.4a | 259.71±65.0a  | 273.49±68.0a  |
|                    |           | ns           | ns           | ns            | ns           | ns           | ns            | ns           | ns            | ns            |

FOLO, forced-air precooling + 30 μm PE liner; FOLX, forced-air precooling; FXLO, 30 μm PE liner; FXLX, control. Mean values followed by different letter(s) within a column denote the significant difference ( $p < 0.05$ ) by Duncan’s multiple range test (DMRT). <sup>ns</sup>, <sup>\*\*</sup>, not significant or significant at,  $p < 0.001$ , respectively. DW (dry weight), (n = 6).

**A**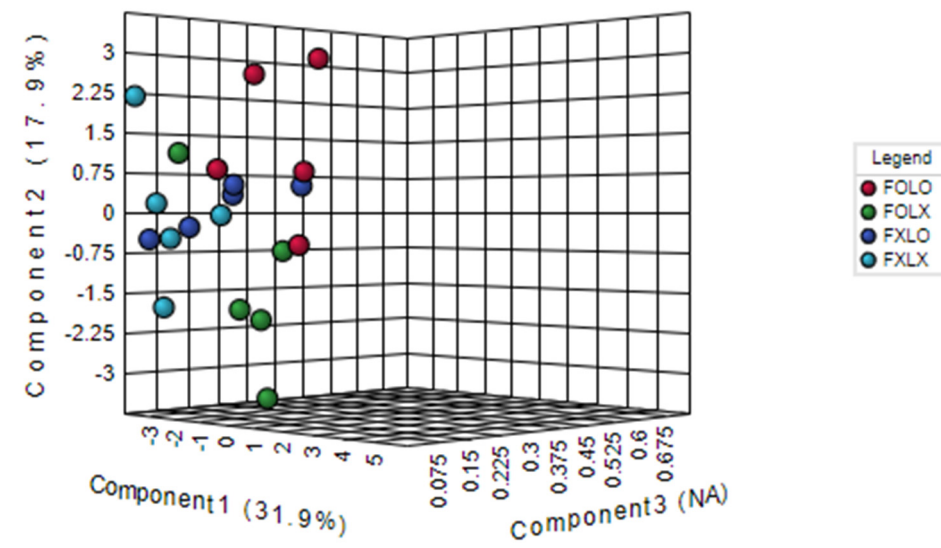**B**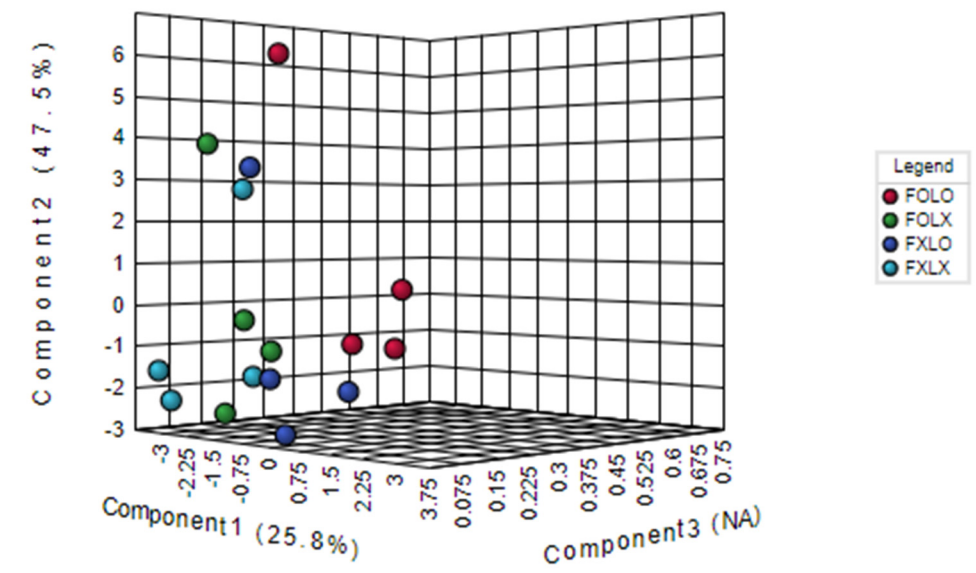

Figure S1. Three-dimensional (3D) sparse partial least squares-discriminant analysis (sPLSDA) scores plot representing treatments of observed parameters of bell pepper cv. Nagano harvested at 90% coloring (A) and 50% coloring (B), and stored at 11 °C and 95% RH for 15 and 16 days respectively. FOLO, forced-air precooling + 30  $\mu$ m PE liner; FOLX, forced-air precooling; FXLO, 30  $\mu$ m PE liner; FXLX, control.
